# Supplementary material for: Chiral luminescent lanthanide complexes possessing strong (samarium, SmIII) circularly polarised luminescence (CPL), and their self-assembly into Langmuir–Blodgett films
Source: Royal Society of Chemistry journal article supplement (doi:10.1039/c9dt02003a), 2019-01-01
Supplement: c9dt02003a1.pdf [file c9dt02003a1.pdf]

**Chiral luminescent lanthanide complexes possessing strong (samarium, Sm<sup>III</sup>)  
circularly polarised luminescence (CPL), and their self-assembly into  
Langmuir-Blodgett films**

*Dawn E. Barry,<sup>\*a</sup> Jonathan A. Kitchen,<sup>\*b</sup> Laszlo Mercs,<sup>c</sup> Robert D. Peacock,<sup>d</sup> Martin Albrecht,<sup>c</sup>  
and Thorfinnur Gunnlaugsson<sup>\*a</sup>*

<sup>a</sup>*School of Chemistry and Trinity Biomedical Science Institute, Trinity College Dublin, Dublin 2, Ireland.*

<sup>b</sup>*Chemistry, School of Natural and Computational Sciences, Massey University, Albany, Auckland,  
New Zealand.*

<sup>c</sup>*School of Chemistry and Chemical Biology, University College Dublin, Belfield, Dublin 4, Ireland.*

<sup>d</sup>*School of Chemistry, University of Glasgow Glasgow, G12 8QQ, Scotland (UK).*

gunnlaut@tcd.ie,

**Supporting Information**

## General Experimental Details

Complexation reactions were carried out in 2-5 mL Biotage Microwave Vials in a Biotage Initiator Eight EXP microwave reactor. Reactions were performed at 70 °C for 10 mins in HPLC grade CH<sub>3</sub>OH. Elemental analyses were carried out at the Microanalytical Laboratory, School of Chemistry and Chemical Biology, University College Dublin. Infrared spectra were recorded on a Perkin Elmer Spectrum One FT-IR spectrometer equipped with a Universal ATR sampling accessory; solid samples were recorded directly as neat samples in cm<sup>-1</sup>. Using a 1.0 cm path length quartz cell, UV-visible absorption and luminescence spectra were recorded at room temperature using a Varian CARY 50 spectrophotometer. The solvents employed were of HPLC or spectrophotometric grade. For UV-visible absorption measurements a scan rate of 600 nm min<sup>-1</sup> was employed and the blank used was a sample of the solvent system in which the titration was undertaken. All absorbance and luminescence scans were measured in arbitrary units. Langmuir measurements were carried out at 25 °C on a KSV MiniMicro Langmuir-Blodgett trough (KSV, Finland). Water was purified with a Milli-Q<sup>®</sup> Integral system (Millipore), and its resistivity was measured to be higher than 18 MΩ cm. A 9:1 mixture of CH<sub>3</sub>Cl/CH<sub>3</sub>OH was used as a spreading solvent and typically drops (20 μL) of the surfactant solution (~0.25 mM) were deposited using a microsyringe on the water subphase. The solvent was left to evaporate for 20 min before the barriers were compressed at 6 mm min<sup>-1</sup>. Surface pressure was monitored using a platinum Wilhelmy plate. Circular dichroism (CD) spectra were recorded on a Jasco J-810-150S spectropolarimeter in a 1.2 mL cell. Each CD trace represents an average of three scans. All CD are represented as mdeg vs λ (nm). Circularly polarised luminescence (CPL) spectra were recorded by Dr. R. Peacock at the University of Glasgow. Excitation was accomplished by using a Coherent 599 tuneable dye laser (0.03 nm resolution) with argon ion laser as a pump source. Calibration of the emission monochromator was accomplished by passing scattered light from a low power HeNe laser through the detection system. The optical detection system consisted of a photoelastic modulator (PEM, Hinds Int.) operating at 50 kHz and a linear polariser, which together act as a circular analyser, followed by a long pass filter, focusing lens and a 0.22 m double monochromator. The emitted light was detected by a cooled EM1-9558QB photomultiplier tube operating in photon counting mode. The 50 KHz reference signal from the photoelastic modulator was used to direct the incoming pulses into two separated counters. An up counter, which counts every photon pulse and thus is a measure of the total luminescence signal  $I = I_{\text{left}} + I_{\text{right}}$ , and an up/down counter, which adds pulses when the analyser is transmitting to the left circularly polarised light and subtracts pulses when the analyser is transmitting right circularly polarised light. The second counter provides a measure of the differential emission intensity  $\Delta I = I_{\text{left}} - I_{\text{right}}$ .

## Experimental details for complexes Ln.L<sub>3</sub> (Ln = Tb<sup>III</sup>, Sm<sup>III</sup>, Lu<sup>III</sup>, Dy<sup>III</sup>, L = **1** (R) or **2** (S))

### *Synthesis of Tb.1<sub>3</sub>:*

Ligand **1** (0.028 g, 0.05 mmol, 3 equiv.) in 5 mL CH<sub>3</sub>OH had solid Tb(CF<sub>3</sub>SO<sub>3</sub>)<sub>3</sub> (0.01 g, 0.02 mmol, 1 equiv.) added and was heated at 70 °C under microwave irradiation for 10 minutes. The resulting clear yellow solution was subjected to vapour diffusion of diethyl ether affording Tb.1<sub>3</sub> as a white solid in 71% yield. HRMS (*m/z*) (MS-LD<sup>+</sup>) Calculated for C<sub>72</sub>H<sub>98</sub>F<sub>6</sub>N<sub>6</sub>O<sub>10</sub>S<sub>2</sub>Tb<sup>+</sup> *m/z* = 1543.5944. Found *m/z* = 1543.5914; Elemental analysis for C<sub>108</sub>H<sub>147</sub>N<sub>9</sub>O<sub>15</sub>F<sub>9</sub>S<sub>3</sub>Tb.3H<sub>2</sub>O (2291.55 g mol<sup>-1</sup>) Calculated: C 56.61, H 6.73, N 5.50. Found C 56.47, H 6.23, N 5.39%. IR(neat): 3276, 2925, 2854, 1634, 1596, 1558, 1460, 1276, 1198, 1163, 1030, 839, 801, 779, 721 cm<sup>-1</sup>.

### *Synthesis of Sm.1<sub>3</sub>:*

Ligand **1** (0.025 g, 0.05 mmol, 3 equiv.) in 5 mL CH<sub>3</sub>OH had solid Sm(CF<sub>3</sub>SO<sub>3</sub>)<sub>3</sub> (0.009 g, 0.02 mmol, 1 equiv.) added and was heated at 70 °C under microwave irradiation for 10 minutes. The resulting clear yellow solution was subjected to vapour diffusion of diethyl ether affording Sm.1<sub>3</sub> as a white solid in 50% yield. HRMS (*m/z*) (MS-LD<sup>+</sup>) Calculated for C<sub>72</sub>H<sub>98</sub>F<sub>6</sub>N<sub>6</sub>O<sub>10</sub>S<sub>2</sub>Sm<sup>+</sup> *m/z* = 1536.5887. Found *m/z* = 1536.5853; [Elemental analysis for C<sub>108</sub>H<sub>147</sub>N<sub>9</sub>O<sub>15</sub>F<sub>9</sub>S<sub>3</sub>Sm. (2228.925 g mol<sup>-1</sup>) Calculated: C 58.14, H 6.65, N 5.65. Found C 58.79, H 6.95, N 5.55%. IR(neat): 3283, 2925, 2854, 1633, 1595, 1559, 1458, 1238, 1225, 1165, 1030, 839, 800, 778, 722 cm<sup>-1</sup>.

### *Synthesis of Lu.1<sub>3</sub>:*

Ligand **1** (0.027 g, 0.05 mmol, 3 equiv.) in 5 mL CH<sub>3</sub>OH had solid Lu(CF<sub>3</sub>SO<sub>3</sub>)<sub>3</sub> (0.009 g, 0.02 mmol, 1 equiv.) added and was heated at 70 °C under microwave irradiation for 10 minutes. The resulting clear yellow solution was subjected to vapour diffusion of diethyl ether affording Lu.1<sub>3</sub> as a white solid in 52% yield. HRMS (*m/z*) (MS-LD<sup>+</sup>) Calculated for C<sub>72</sub>H<sub>98</sub>F<sub>6</sub>N<sub>6</sub>O<sub>10</sub>S<sub>2</sub>Lu<sup>+</sup> *m/z* = 1559.6098. Found *m/z* = 1559.5941; [Elemental analysis for C<sub>108</sub>H<sub>147</sub>N<sub>9</sub>O<sub>15</sub>F<sub>9</sub>S<sub>3</sub>Lu.2H<sub>2</sub>O (2251.94 g mol<sup>-1</sup>) Calculated: C 56.64, H 6.65, N 5.50. Found C 56.38, H 6.21, N 5.41%. IR(neat): 3270, 2926, 2854, 1635, 1598, 1562, 1461, 1240, 1161, 1029, 917, 841, 800, 777, 723 cm<sup>-1</sup>.

### *Synthesis of Dy.1<sub>3</sub>:*

Ligand **1** (0.025 g, 0.05 mmol, 3 equiv.) in 5 mL CH<sub>3</sub>OH had solid Dy(CF<sub>3</sub>SO<sub>3</sub>)<sub>3</sub> (0.009 g, 0.02 mmol, 1 equiv.) added and was heated at 70 °C under microwave irradiation for 10 minutes. The resulting clear yellow solution was subjected to vapour diffusion of diethyl ether affording Dy.1<sub>3</sub> as a white solid in 50 % yield. HRMS (*m/z*) (MS-LD<sup>+</sup>) Calculated for C<sub>72</sub>H<sub>98</sub>F<sub>6</sub>N<sub>6</sub>O<sub>10</sub>S<sub>2</sub>Dy<sup>+</sup> *m/z* = 1548.5982. Found *m/z* = 1548.6006; [Elemental analysis for C<sub>108</sub>H<sub>147</sub>N<sub>9</sub>O<sub>15</sub>F<sub>9</sub>S<sub>3</sub>Dy.3H<sub>2</sub>O (2240.93 g mol<sup>-1</sup>) Calculated: C 56.47, H 6.71, N 5.49. Found C 56.08, H 6.53, N 5.35%. IR(neat): 3275, 2925, 2854, 1634, 1596, 1562, 1460, 1240, 1163, 1030, 840, 800, 778, 755, 722 cm<sup>-1</sup>.

### *Synthesis of Tb.2<sub>3</sub>:*

Ligand **2** (0.021 g, 0.04 mmol, 3 equiv.) in 5 mL CH<sub>3</sub>OH had solid Tb(CF<sub>3</sub>SO<sub>3</sub>)<sub>3</sub> (0.008 g, 0.01 mmol, 1 equiv.) added and was heated at 70 °C under microwave irradiation for 10 minutes. The resulting clear yellow solution was subjected to vapour diffusion of diethyl ether affording Tb.**2**<sub>3</sub> as a white solid in 52% yield. HRMS (*m/z*) (MS-LD<sup>+</sup>) Calculated for C<sub>72</sub>H<sub>98</sub>F<sub>6</sub>N<sub>6</sub>O<sub>10</sub>S<sub>2</sub>Tb<sup>+</sup> *m/z* = 1543.5944. Found *m/z* = 1543.5908; Elemental analysis for C<sub>108</sub>H<sub>147</sub>N<sub>9</sub>O<sub>15</sub>F<sub>9</sub>S<sub>3</sub>Tb.5H<sub>2</sub>O (2327.56 g mol<sup>-1</sup>) Calculated: C 55.73, H 6.80, N 5.42. Found C 55.73, H 6.80, N 5.42%. IR(neat): 3282, 2925, 2854, 1634, 1596, 1558, 1457, 1240, 1197, 1164, 1030, 839, 801, 779, 752, 721 cm<sup>-1</sup>.

#### *Synthesis of Sm.**2**<sub>3</sub>:*

Ligand **2** (0.030 g, 0.05 mmol, 3 equiv.) in 5 mL CH<sub>3</sub>OH had solid Sm(CF<sub>3</sub>SO<sub>3</sub>)<sub>3</sub> (0.011 g, 0.02 mmol, 1 equiv.) added and was heated at 70 °C under microwave irradiation for 10 minutes. The resulting clear yellow solution was subjected to vapour diffusion of diethyl ether affording Sm.**2**<sub>3</sub> as a white solid in 46% yield. HRMS (*m/z*) (MS-LD<sup>+</sup>) Calculated for C<sub>72</sub>H<sub>98</sub>F<sub>6</sub>N<sub>6</sub>O<sub>10</sub>S<sub>2</sub>Sm<sup>+</sup> *m/z* = 1536.5887. Found *m/z* = 1536.5863; [Elemental analysis for C<sub>108</sub>H<sub>147</sub>N<sub>9</sub>O<sub>15</sub>F<sub>9</sub>S<sub>3</sub>Sm.H<sub>2</sub>O (2246.95 g mol<sup>-1</sup>) Calculated: C 57.73, H 6.68, N 5.61. Found C 57.45, H 6.40, N 5.83%. IR(neat): 3282, 2925, 2854, 1633, 1595, 1558, 1457, 1238, 1163, 1030, 838, 801, 779, 750 cm<sup>-1</sup>.

#### *Synthesis of Lu.**2**<sub>3</sub>:*

Ligand **2** (0.034 g, 0.06 mmol, 3 equiv.) in 5 mL CH<sub>3</sub>OH had solid Lu(CF<sub>3</sub>SO<sub>3</sub>)<sub>3</sub> (0.013 g, 0.02 mmol, 1 equiv.) added and was heated at 70 °C under microwave irradiation for 10 minutes. The resulting clear yellow solution was subjected to vapour diffusion of diethyl ether affording Lu.**2**<sub>3</sub> as a white solid in 53% yield. HRMS (*m/z*) (MS-LD<sup>+</sup>) Calculated for C<sub>72</sub>H<sub>98</sub>F<sub>6</sub>N<sub>6</sub>O<sub>10</sub>S<sub>2</sub>Lu<sup>+</sup> *m/z* = 1559.6098. Found *m/z* = 1559.6055; [Elemental analysis for C<sub>108</sub>H<sub>147</sub>N<sub>9</sub>O<sub>15</sub>F<sub>9</sub>S<sub>3</sub>Lu.3H<sub>2</sub>O (2307.59 g mol<sup>-1</sup>) Calculated: C 56.21, H 6.68, N 5.58. Found C 56.21, H 5.94, N 5.83%. IR(neat): 3277, 2925, 2854, 1638, 1598, 1561, 1461, 1240, 1199, 1163, 1030, 839, 801, 779, 757, 722 cm<sup>-1</sup>.

#### *Synthesis of Dy.**2**<sub>3</sub>:*

Ligand **2** (0.032 g, 0.06 mmol, 3 equiv.) in 5 mL CH<sub>3</sub>OH had solid Dy(CF<sub>3</sub>SO<sub>3</sub>)<sub>3</sub> (0.018 g, 0.03 mmol, 1 equiv.) added and was heated at 70 °C under microwave irradiation for 10 minutes. The resulting clear yellow solutions was subjected to vapour diffusion of diethyl ether affording Dy.**2**<sub>3</sub> as a white solid in 36 % yield. HRMS (*m/z*) (MS-LD<sup>+</sup>) Calculated for C<sub>72</sub>H<sub>98</sub>F<sub>6</sub>N<sub>6</sub>O<sub>10</sub>S<sub>2</sub>Dy<sup>+</sup> *m/z* = 1548.5982. Found *m/z* = 1548.5920; [Elemental analysis for C<sub>108</sub>H<sub>147</sub>N<sub>9</sub>O<sub>15</sub>F<sub>9</sub>S<sub>3</sub>Dy.5H<sub>2</sub>O (2331.13 g mol<sup>-1</sup>) Calculated: C 55.64, H 6.79, N 5.41. Found C 55.68, H 6.26, N 5.27%. IR(neat): 3277, 2925, 2854, 1635, 1596, 1562, 1460, 1240, 1164, 1030, 840, 800, 778, 755 cm<sup>-1</sup>.

**Table S1.** % yields calculated for solid complexes Ln.**1**<sub>3</sub> and Ln.**2**<sub>3</sub> ( Ln = Tb<sup>III</sup>, Sm<sup>III</sup>, Lu<sup>III</sup>, Dy<sup>III</sup>) following preparation under microwave irradiation and isolation *via* diethyl ether diffusion.

| Complex           | Yield (%)    |              |
|-------------------|--------------|--------------|
|                   | L = <b>1</b> | L = <b>2</b> |
| Tb.L <sub>3</sub> | 71           | 52           |
| Sm.L <sub>3</sub> | 50           | 46           |
| Lu.L <sub>3</sub> | 52           | 53           |
| Dy.L <sub>3</sub> | 50           | 36           |

**Table S2.** Amide carbonyl stretching frequency shifts upon complexation of ligands **1** and **2** with 0.33 equiv. of Ln(CF<sub>3</sub>SO<sub>3</sub>)<sub>3</sub> (Ln = Tb<sup>III</sup>, Sm<sup>III</sup>, Lu<sup>III</sup>, Dy<sup>III</sup>).

| Compound          | Amide carbonyl stretching frequency (cm <sup>-1</sup> ) |                                              |
|-------------------|---------------------------------------------------------|----------------------------------------------|
|                   | L = <b>1</b> (R)<br>(1650 cm <sup>-1</sup> )            | L = <b>2</b> (S)<br>(1654 cm <sup>-1</sup> ) |
| Tb.L <sub>3</sub> | 1634                                                    | 1634                                         |
| Sm.L <sub>3</sub> | 1633                                                    | 1633                                         |
| Lu.L <sub>3</sub> | 1635                                                    | 1638                                         |
| Dy.L <sub>3</sub> | 1634                                                    | 1635                                         |

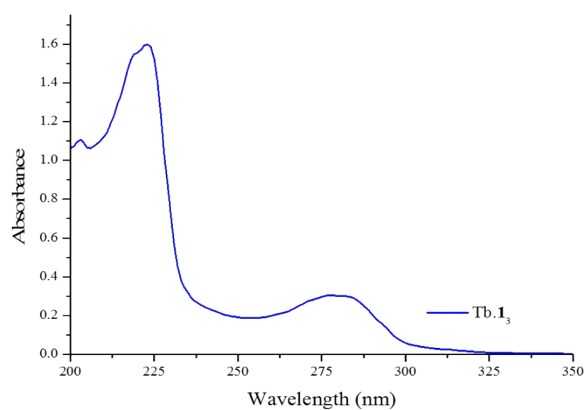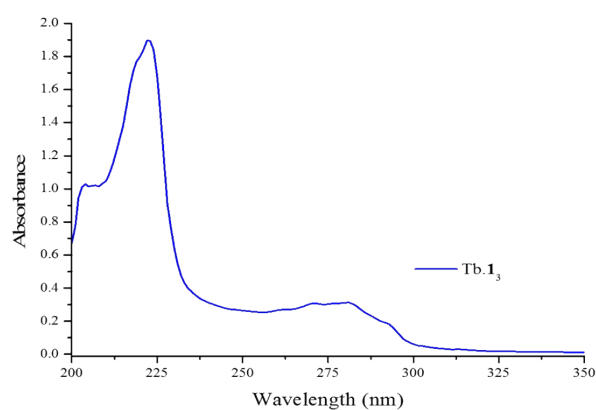

**Figure S1.** UV-Visible spectra of Tb.1<sub>3</sub> (*R*) recorded in (Left) CH<sub>3</sub>CN (8.7 x 10<sup>-6</sup> M) and (Right) CH<sub>3</sub>OH (7.6 x 10<sup>-6</sup> M).

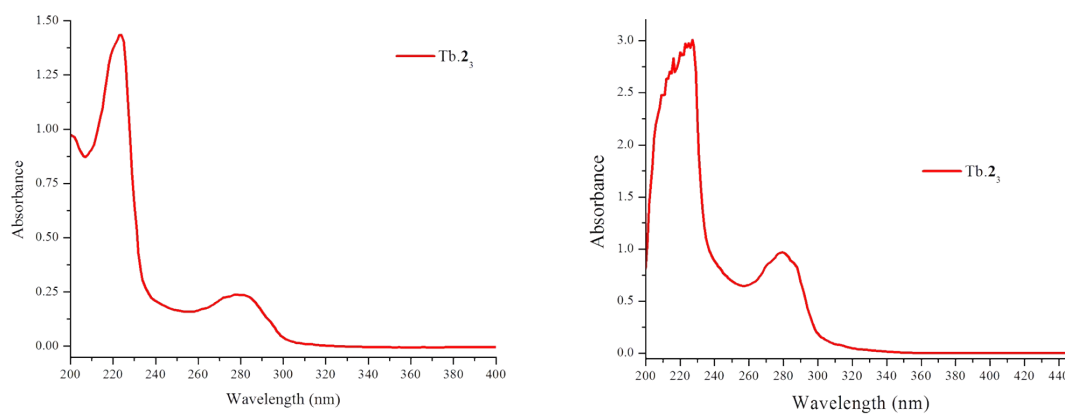

**Figure S2.** UV-Visible spectra of Tb.2<sub>3</sub> (*S*) recorded in (Left) CH<sub>3</sub>CN (5.7 x 10<sup>-6</sup> M) and (Right) CH<sub>3</sub>OH (2.3 x 10<sup>-5</sup> M).

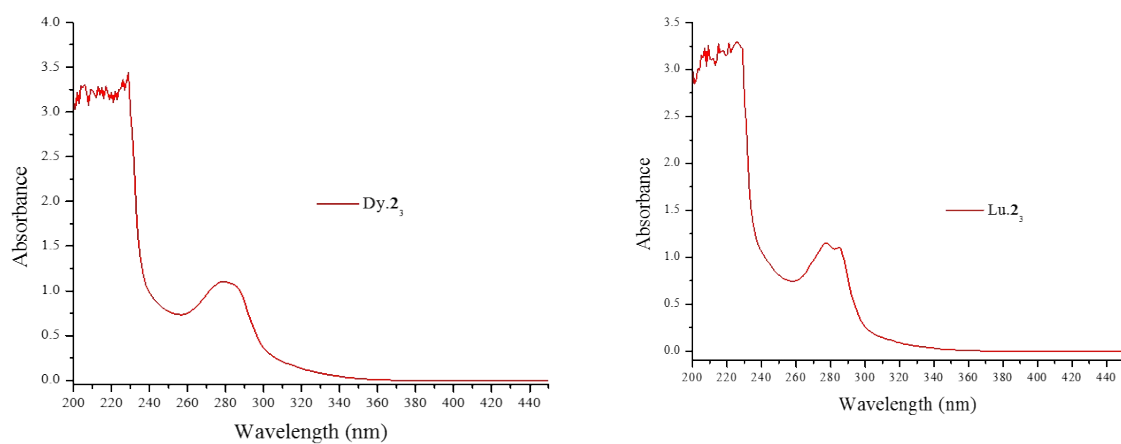

**Figure S3** UV-visible absorption spectra of (Left) **Dy.2<sub>3</sub>** (*S*) ( $3.1 \times 10^{-5} \text{ M}$ ) and (Right) **Lu.2<sub>3</sub>** (*S*) ( $2.9 \times 10^{-5} \text{ M}$ ) in  $\text{CH}_3\text{CN}$ .

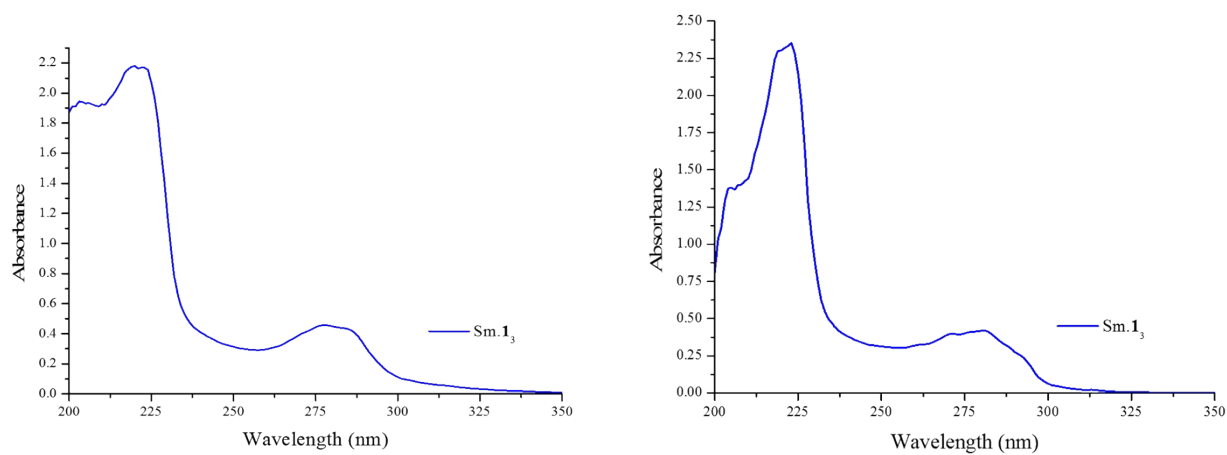

**Figure S4.** UV-Visible spectra of **Sm.1<sub>3</sub>** (*R*) recorded in (Left)  $\text{CH}_3\text{CN}$  ( $1.2 \times 10^{-5} \text{ M}$ ) and (Right)  $\text{CH}_3\text{OH}$  ( $1.1 \times 10^{-5} \text{ M}$ ).

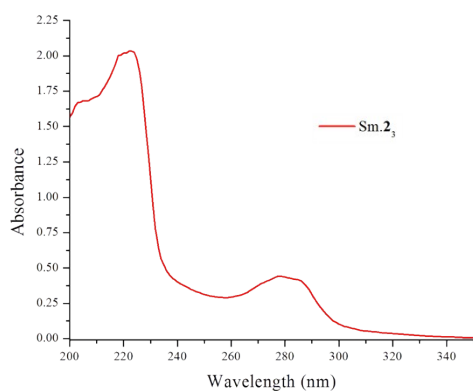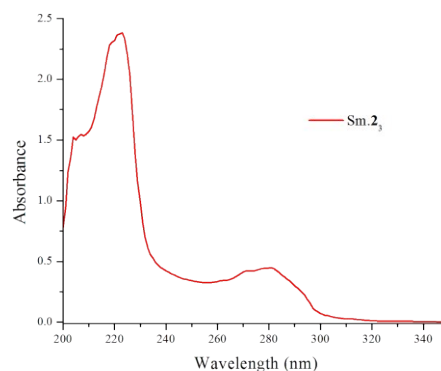

**Figure S5.** UV-Visible spectra of Sm.2<sub>3</sub> (S) recorded in (Left) CH<sub>3</sub>CN (1.1 × 10<sup>-5</sup> M) and (Right) CH<sub>3</sub>OH (1.2 × 10<sup>-5</sup> M).

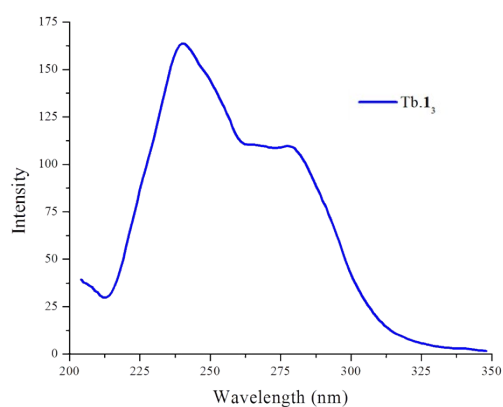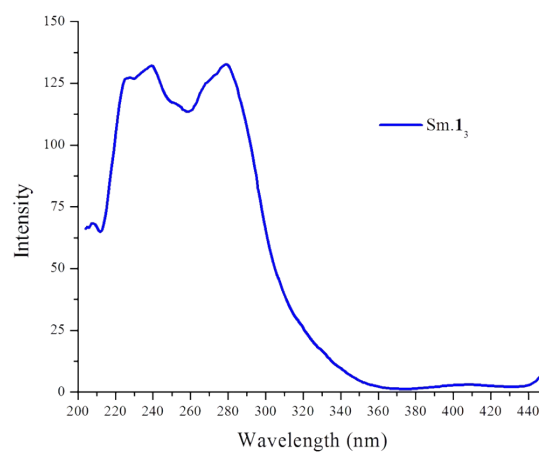

**Figure S6.** Excitation spectra of (Left) Tb.1<sub>3</sub> (R) (8.7 × 10<sup>-6</sup> M) (λ<sub>em</sub> = 545 nm) and (Right) Sm.1<sub>3</sub> (R) (1.2 × 10<sup>-5</sup> M) (λ<sub>em</sub> = 600 nm) recorded in CH<sub>3</sub>CN.

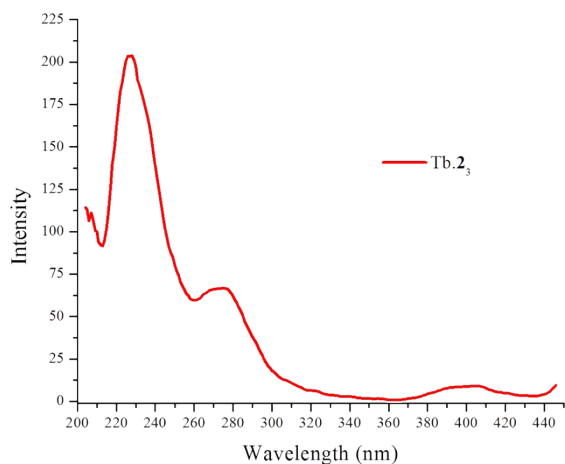

**Figure S7.** Excitation spectra of (Left) Tb.2<sub>3</sub> (S) (5.7 × 10<sup>-6</sup> M) (λ<sub>em</sub> = 545 nm)

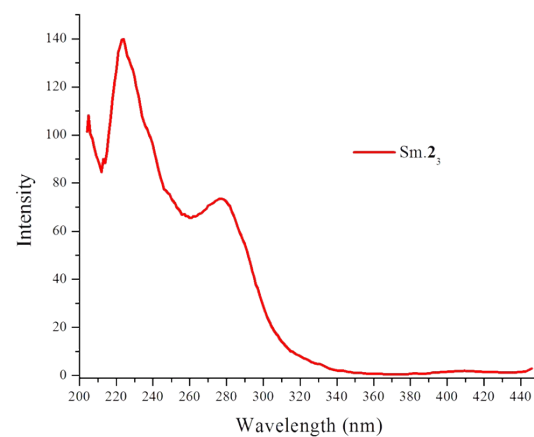



and (Right) Sm.**2**<sub>3</sub> (S) ( $1.1 \times 10^{-5}$  M) ( $\lambda_{\text{em}} = 600$  nm) recorded in CH<sub>3</sub>CN.

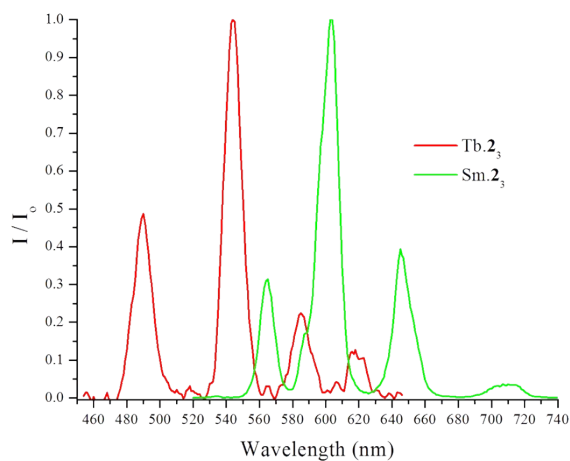

**Figure S8.** Normalised phosphorescence spectra of Tb.**2**<sub>3</sub> and Sm.**2**<sub>3</sub> recorded in CH<sub>3</sub>CN.

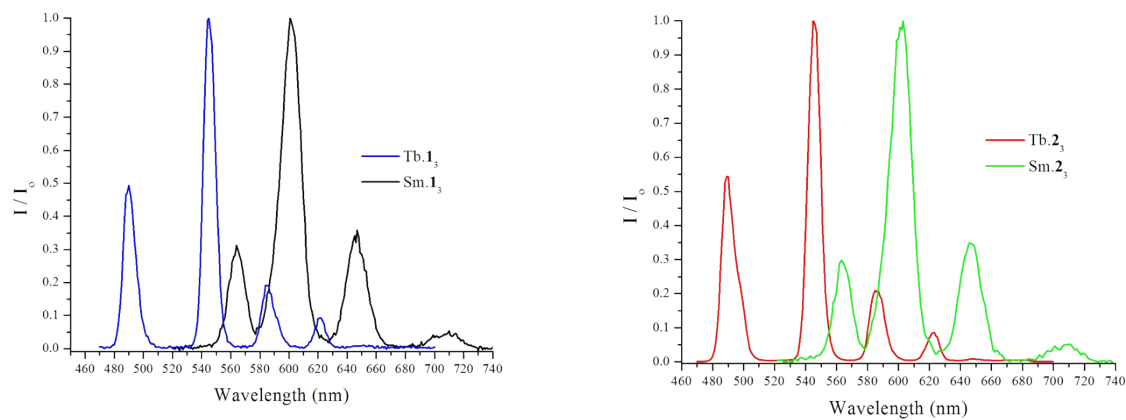

**Figure S9.** Normalised phosphorescence spectra of (Left) Tb.**1**<sub>3</sub> (R) and Sm.**1**<sub>3</sub> (R) and (Right) Tb.**2**<sub>3</sub> (S) and Sm.**2**<sub>3</sub> (S) recorded in CH<sub>3</sub>OH.

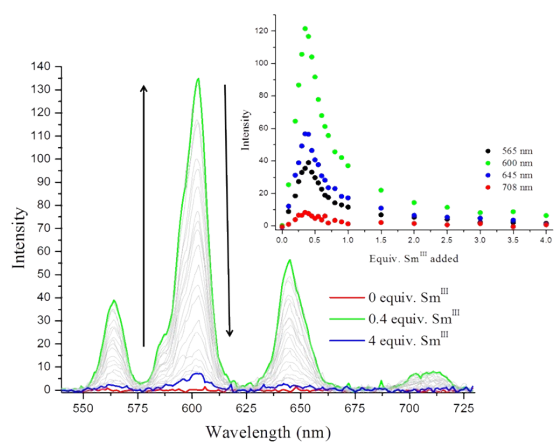

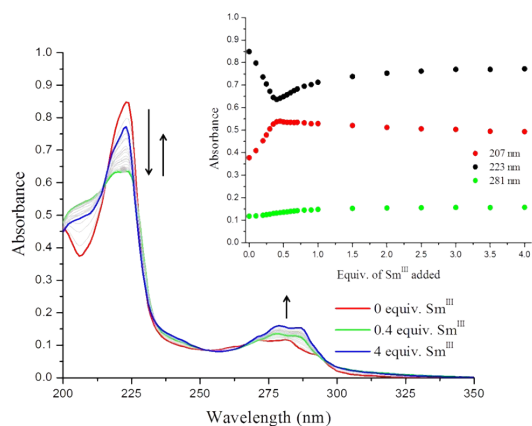

**Figure S10.** Overall changes in the (Left) UV-visible absorption spectra and (Right) Sm<sup>III</sup>-centred phosphorescence spectra upon titrating of **1** (1 × 10<sup>-5</sup> M) against Sm(CF<sub>3</sub>SO<sub>3</sub>)<sub>3</sub> (0 → 4 equiv.) in CH<sub>3</sub>CN at RT. **Inset:** corresponding experimental binding isotherm of (Left) absorbance at λ = 207, 223 nm and 281 nm and (Right) Sm<sup>III</sup> phosphorescence emission intensity at λ =

565 nm, 600 nm, 645 nm and 708 nm.

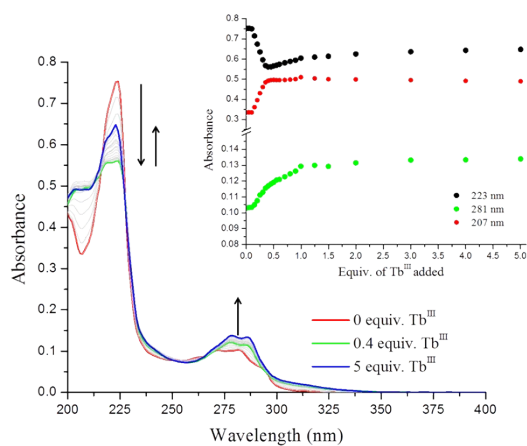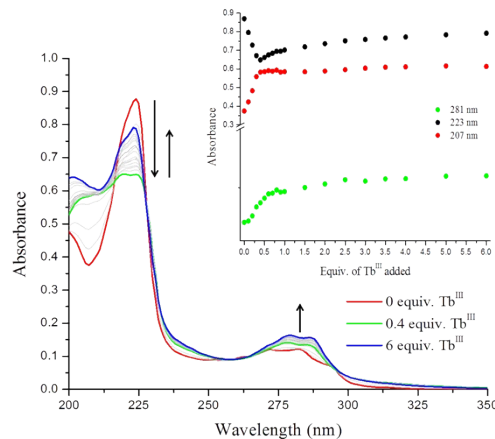

**Figure S11.** Overall changes in the UV-visible absorption spectra upon titrating (Left) **1** (0 → 5 equiv.) and (Right) **2** (0 → 6 equiv.) (1 × 10<sup>-5</sup> M) against increasing Tb(CF<sub>3</sub>SO<sub>3</sub>)<sub>3</sub> in CH<sub>3</sub>CN at RT. **Inset:** corresponding experimental binding isotherm of absorbance at λ = 207, 223 nm and 281 nm.

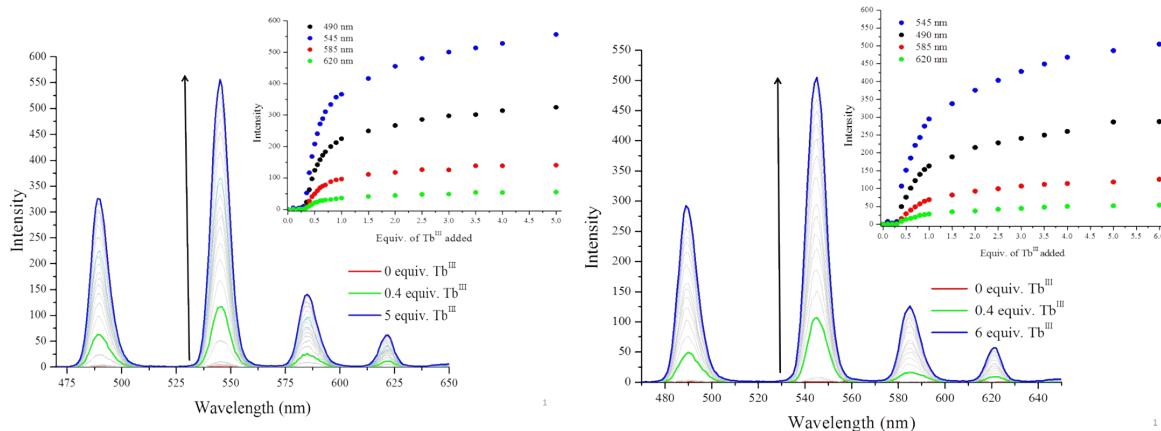

**Figure S12.** Overall changes in luminescence spectra upon titrating (Left) **1** (0→5equiv.) and (Right) **2** (0→6 equiv.) ( $1 \times 10^{-5}$  M) against Tb(CF<sub>3</sub>SO<sub>3</sub>)<sub>3</sub> in CH<sub>3</sub>CN at RT. **Inset:** corresponding experimental binding isotherm of luminescence at  $\lambda = 490, 545, 585$  and  $620$  nm.

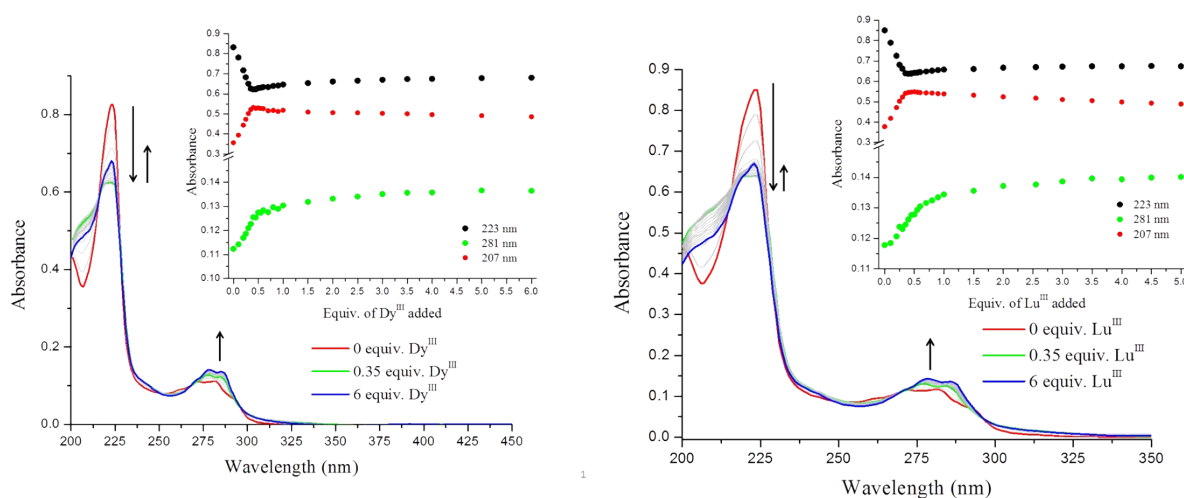

**Figure S13.** Overall changes in the UV-visible absorption spectra upon titrating **1** ( $1 \times 10^{-5}$  M) against (Left) Dy(CF<sub>3</sub>SO<sub>3</sub>)<sub>3</sub> (0→6 equiv.) and (Right) Lu(CF<sub>3</sub>SO<sub>3</sub>)<sub>3</sub> (0→5 equiv.) in CH<sub>3</sub>CN at RT. **Inset:** corresponding experimental binding isotherm of absorbance at  $\lambda = 207, 223$  nm and  $281$  nm.

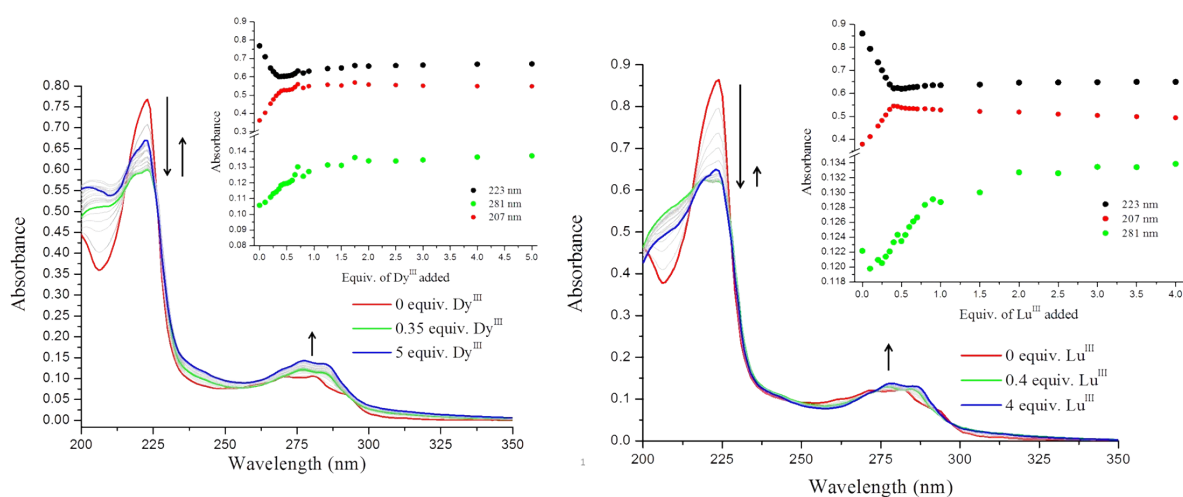

**Figure S14.** Overall changes in the UV-visible absorption spectra upon titrating **2** (1 × 10<sup>-5</sup> M) against (Left) Dy(CF<sub>3</sub>SO<sub>3</sub>)<sub>3</sub> (0→5 equiv.) and (Right) Lu(CF<sub>3</sub>SO<sub>3</sub>)<sub>3</sub> (0→4equiv.) in CH<sub>3</sub>CN at RT. **Inset:** corresponding experimental binding isotherm of absorbance at λ = 207, 223 nm and 281 nm.

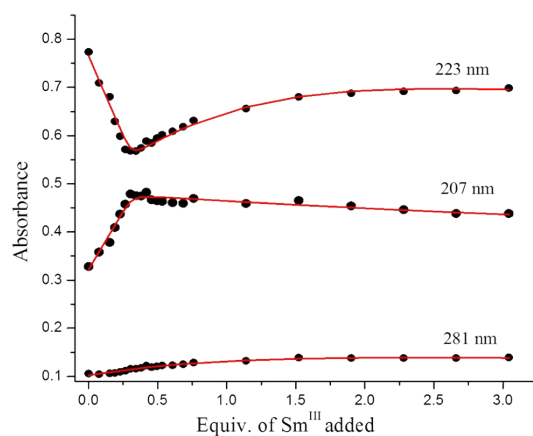

**Figure S15.** Fit of the experimental binding isotherms using the non-linear regression analysis program SPECFIT (upon titrating **2** against Sm(CF<sub>3</sub>SO<sub>3</sub>)<sub>3</sub> in CH<sub>3</sub>CN).

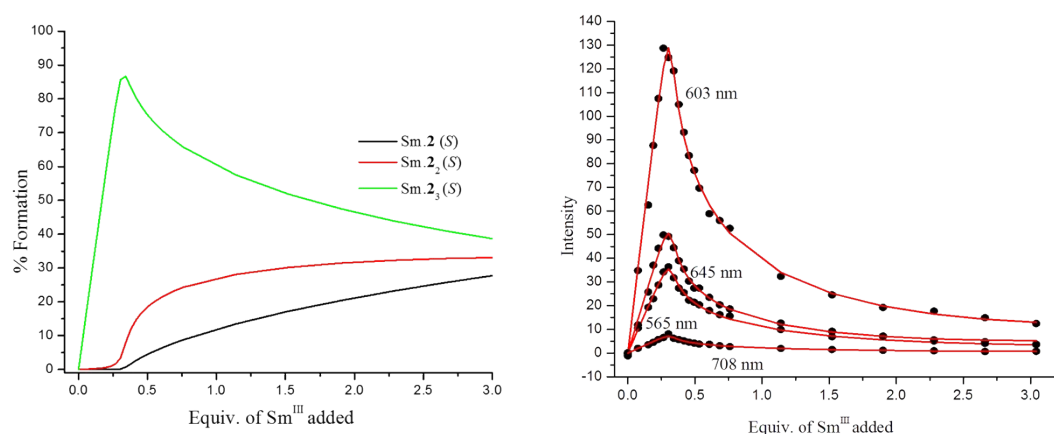

**Figure S16.** (Left) The speciation distribution diagram obtained from the luminescence titration data fit (upon titrating **2** against  $\text{Sm}(\text{CF}_3\text{SO}_3)_3$  in  $\text{CH}_3\text{CN}$ ) and (Right) the fit of the experimental binding isotherms using the non-linear regression analysis program SPECFIT.

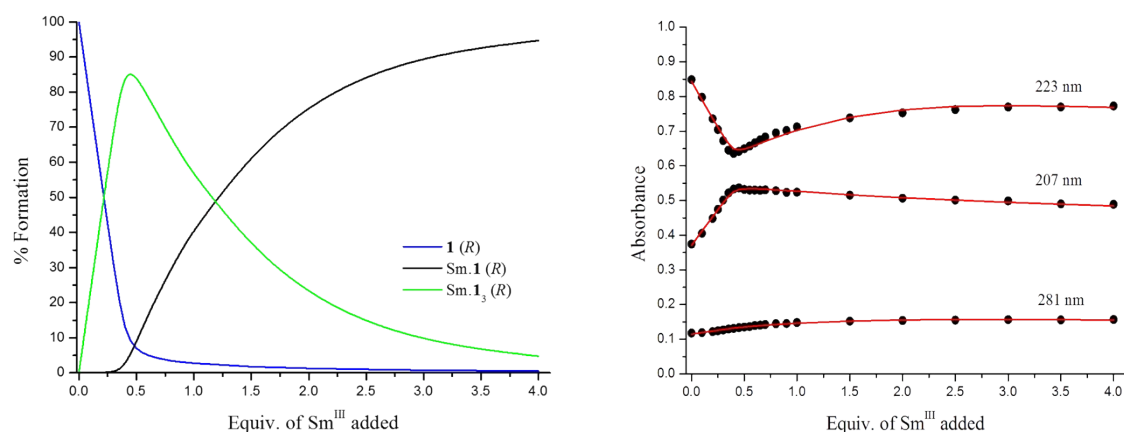

**Figure S17.** (Left) The speciation distribution diagram obtained from the UV-visible absorption titration data fit (upon titrating ligand **1** against  $\text{Sm}(\text{CF}_3\text{SO}_3)_3$  in  $\text{CH}_3\text{CN}$ ) and (Right) the fit of the experimental binding isotherms using the non-linear regression analysis program SPECFIT.

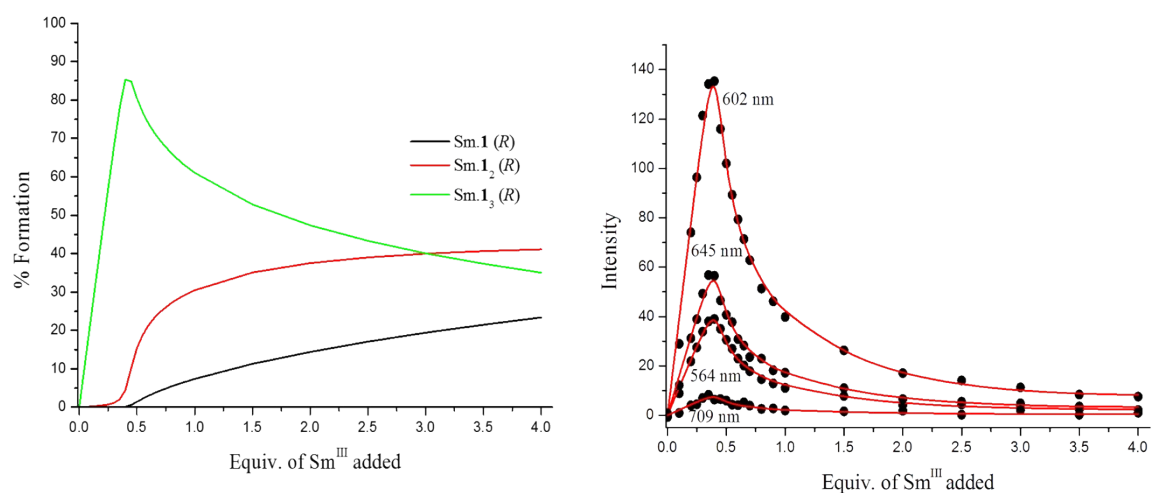

**Figure S18.** (Left) The speciation distribution diagram obtained from the luminescence titration data fit (upon titrating ligand **1** against Sm(CF<sub>3</sub>SO<sub>3</sub>)<sub>3</sub> in CH<sub>3</sub>CN) and (Right) the fit of the experimental binding isotherms using the non-linear regression analysis program SPECFIT.

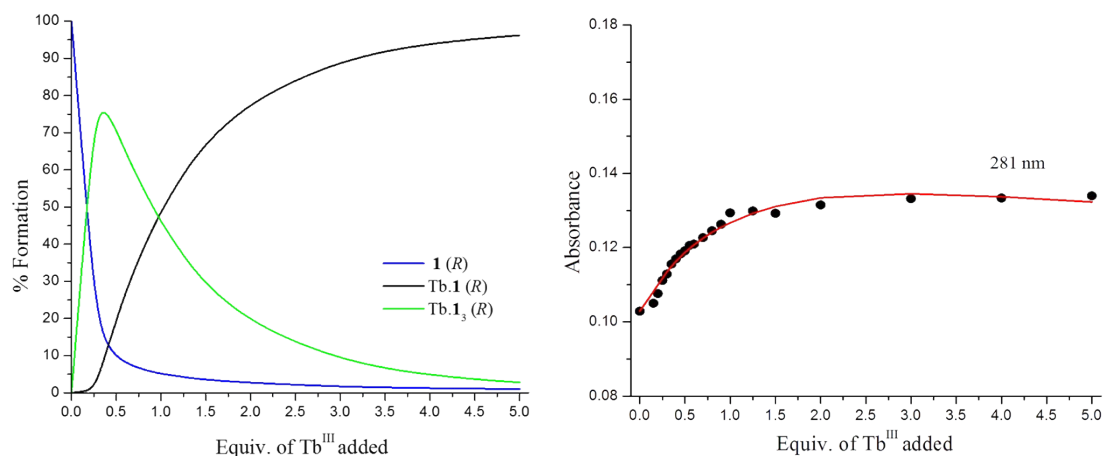

**Figure S19.** (Left) The speciation distribution diagram obtained from the UV-visible absorption titration data fit (upon titrating ligand **1** against Tb(CF<sub>3</sub>SO<sub>3</sub>)<sub>3</sub> in CH<sub>3</sub>CN) and (Right) the fit of the experimental binding isotherms using the non-linear regression analysis program SPECFIT.

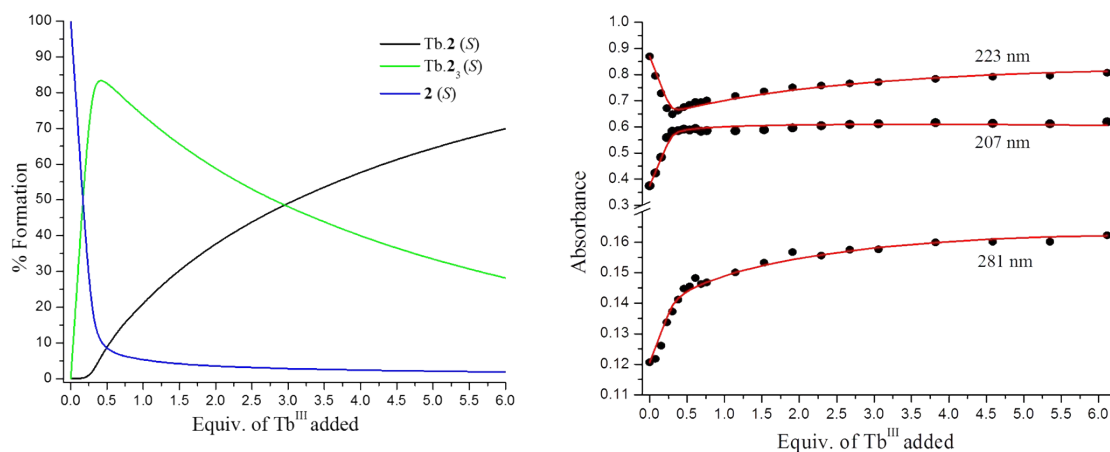

**Figure S20.** (Left) The speciation distribution diagram obtained from the UV-visible absorption titration data fit (upon titrating ligand **2** against  $\text{Tb}(\text{CF}_3\text{SO}_3)_3$  in  $\text{CH}_3\text{CN}$ ) and (Right) the fit of the experimental binding isotherms using the non-linear regression analysis program SPECFIT.

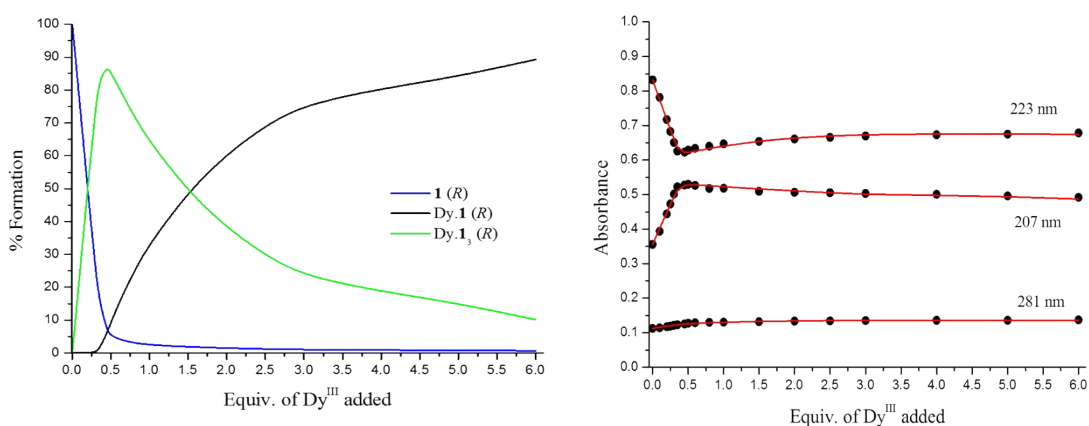

**Figure S21.** (Left) The speciation distribution diagram obtained from the UV-visible absorption titration data fit (upon titrating ligand **1** against  $\text{Dy}(\text{CF}_3\text{SO}_3)_3$  in  $\text{CH}_3\text{CN}$ ) and (Right) the fit of the experimental binding isotherms using the non-linear regression analysis program SPECFIT.

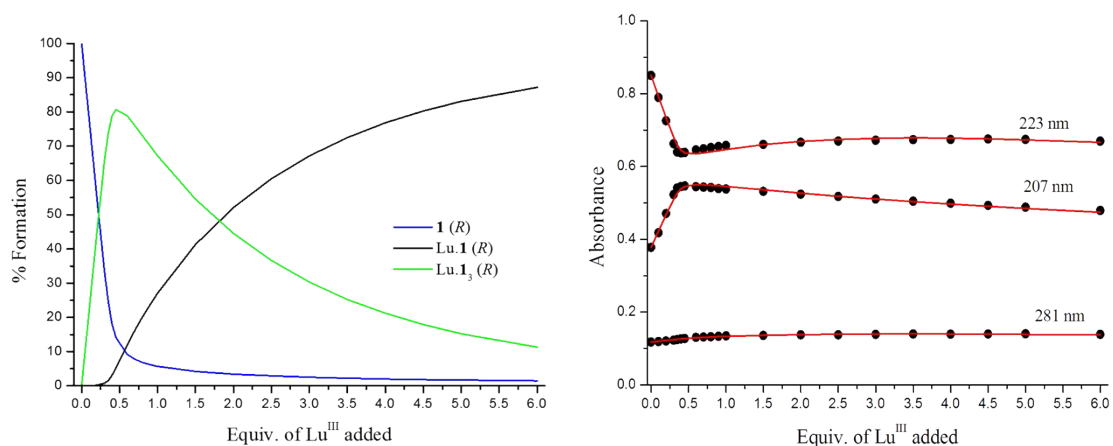

**Figure S22.** (Left) The speciation distribution diagram obtained from the UV-visible absorption titration data fit (upon titrating ligand **1** against  $\text{Lu}(\text{CF}_3\text{SO}_3)_3$  in  $\text{CH}_3\text{CN}$ ) and (Right) the fit of the experimental binding isotherms using the non-linear regression analysis program SPECFIT.

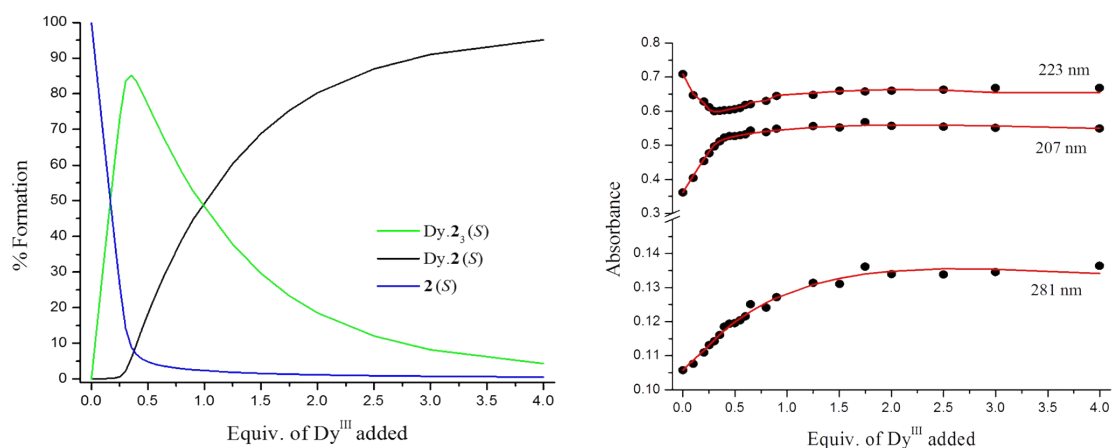

**Figure S23.** (Left) The speciation distribution diagram obtained from the UV-visible absorption titration data fit (upon titrating ligand **2** against  $\text{Dy}(\text{CF}_3\text{SO}_3)_3$  in  $\text{CH}_3\text{CN}$ ) and (Right) the fit of the experimental binding isotherms using the non-linear regression analysis program SPECFIT.



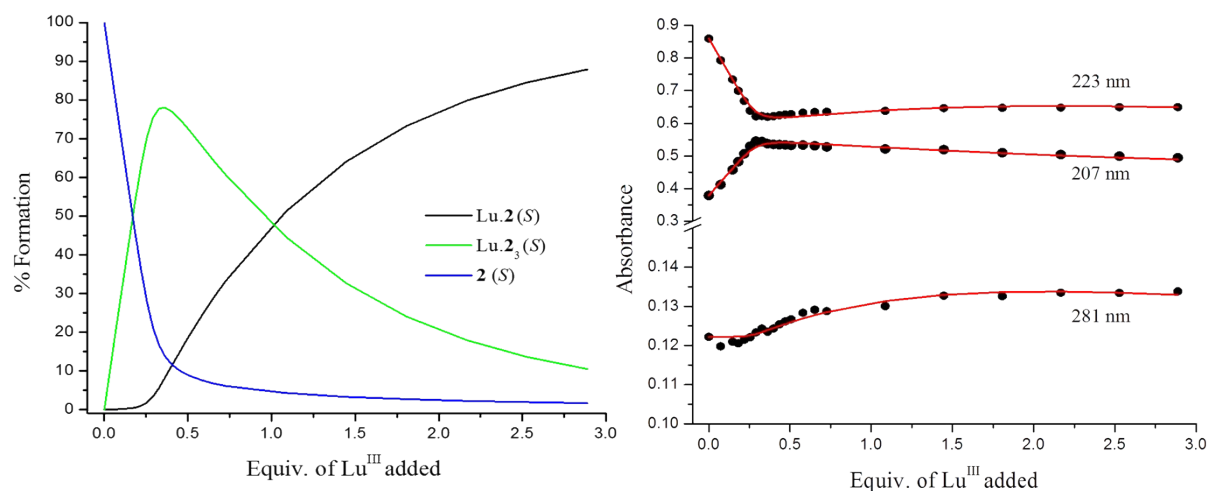

**Figure S24.** (Left) The speciation distribution diagram obtained from the UV-visible absorption titration data fit (upon titrating ligand **2** against  $\text{Lu}(\text{CF}_3\text{SO}_3)_3$  in  $\text{CH}_3\text{CN}$ ) and (Right) the fit of the experimental binding isotherms using the non-linear regression analysis program SPECFIT.

**Table S3.** Summary of binding constants obtained from non-linear regression analyses of data from ligands **1** (top) and **2** (bottom) titrated against  $\text{Ln}(\text{CF}_3\text{SO}_3)_3$  ( $\text{Ln} = \text{Tb}, \text{Sm}, \text{Lu}, \text{Dy}$ ).

| $\text{Ln.L}_3$ | UV-visible absorption |                   | Luminescence      |                   |                   |
|-----------------|-----------------------|-------------------|-------------------|-------------------|-------------------|
|                 | $\log \beta_{11}$     | $\log \beta_{13}$ | $\log \beta_{11}$ | $\log \beta_{12}$ | $\log \beta_{13}$ |
| $\text{Tb.1}_3$ | 6.4*                  | $18.3 \pm 0.2$    | -                 | -                 | -                 |
| $\text{Sm.1}_3$ | $6.8 \pm 0.2$         | $19.4 \pm 0.4$    | $6.2 \pm 0.2$     | $13.4 \pm 0.1$    | $20.4 \pm .2$     |
| $\text{Dy.1}_3$ | $6.6 \pm 0.2$         | $19.4 \pm 0.4$    | -                 | -                 | -                 |
| $\text{Lu.1}_3$ | $6.2 \pm 0.2$         | $18.3 \pm 0.3$    | -                 | -                 | -                 |
| $\text{Tb.2}_3$ | $5.8 \pm 0.2$         | $18.1 \pm 0.3$    | -                 | -                 | -                 |
| $\text{Sm.2}_3$ | $6.8 \pm 0.2$         | $19.8 \pm 0.5$    | $6.2 \pm 0.2$     | $13.2 \pm 0.2$    | $20.3 \pm 0.2$    |
| $\text{Dy.2}_3$ | $6.7 \pm 0.2$         | $19.4 \pm 0.4$    | -                 | -                 | -                 |
| $\text{Lu.2}_3$ | $6.3 \pm 0.2$         | $18.3 \pm 0.3$    | -                 | -                 | -                 |

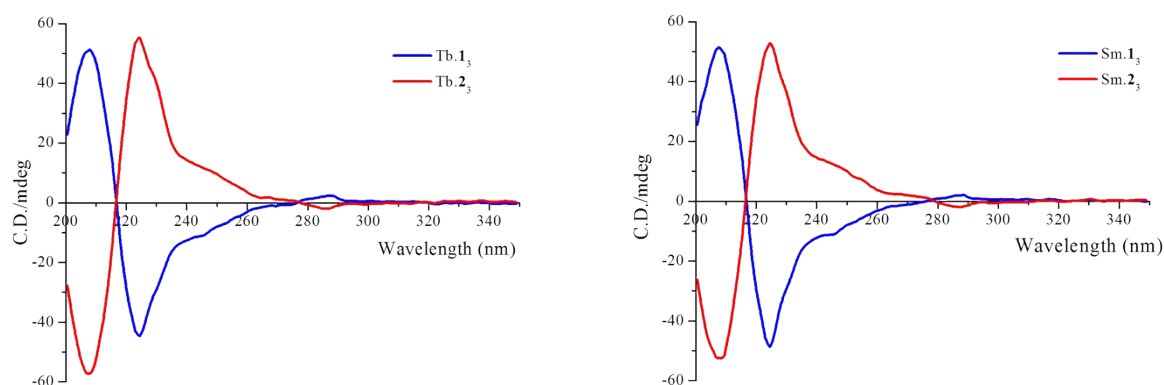

**Figure S25.** The circular dichroism spectra of **1** and **2** ( $2 \times 10^{-5}$  M) recorded in  $\text{CH}_3\text{CN}$  at RT after the addition of 0.33 equiv. of (Left)  $\text{Tb}(\text{CF}_3\text{SO}_3)_3$  and (Right)  $\text{Sm}(\text{CF}_3\text{SO}_3)_3$  - note that discrepancies in intensities can be derived from the slight differences in concentrations.

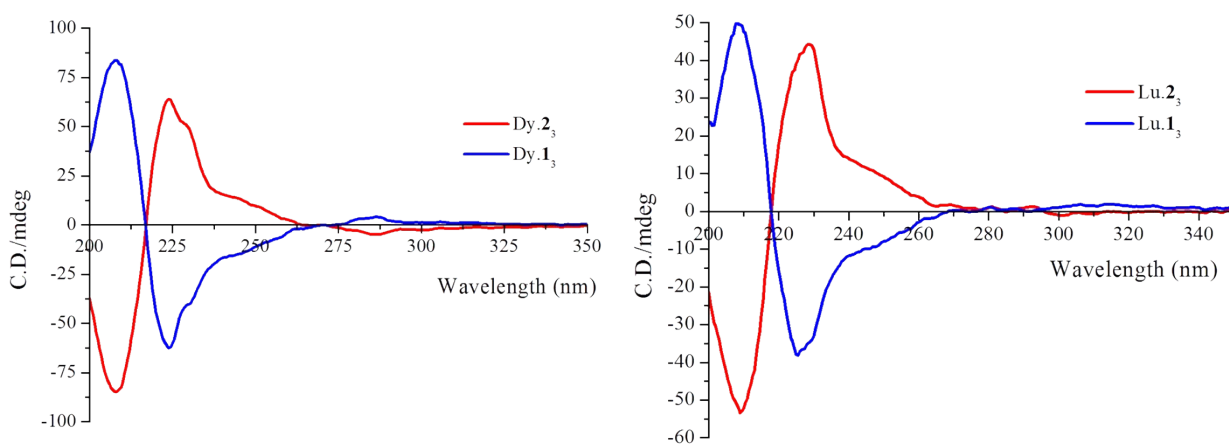

**Figure S26.** The circular dichroism spectra of **1** ( $3.9 \times 10^{-5}$  M) and **2** ( $3.3 \times 10^{-5}$  M) recorded in  $\text{CH}_3\text{CN}$  at RT after the addition of 0.33 equiv. of (Left)  $\text{Dy}(\text{CF}_3\text{SO}_3)_3$  and (Right)  $\text{Lu}(\text{CF}_3\text{SO}_3)_3$  - note that discrepancies in intensities can be derived from the slight differences in concentrations.

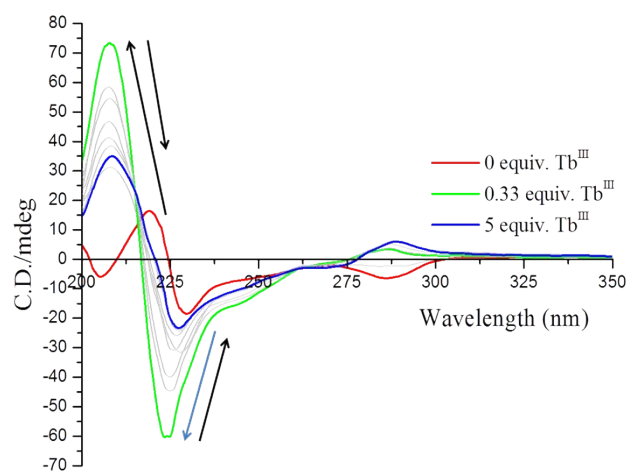

**Figure S27.** The overall changes in the CD spectra of **1** (*R*) ( $3.5 \times 10^{-5}$  M) upon titrating against increasing concentrations of  $\text{Tb}(\text{CF}_3\text{SO}_3)_3$  (0→5 equiv.) at RT in  $\text{CH}_3\text{CN}$ .

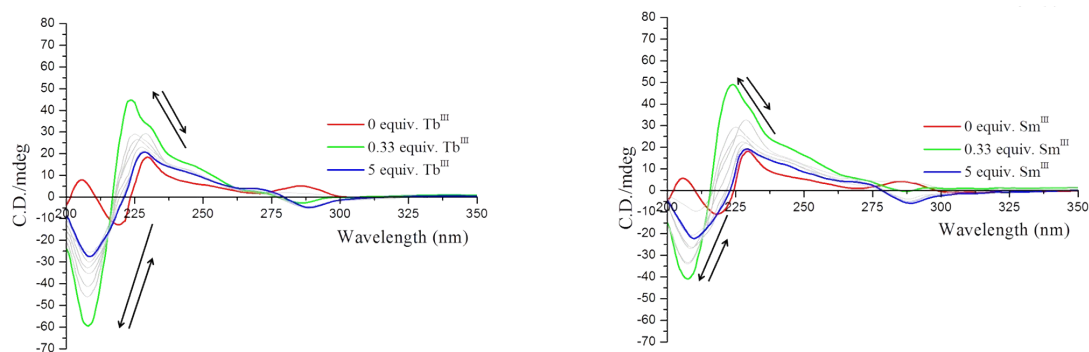

**Figure S28.** The overall changes in the CD spectra of **2** (*S*) ( $3.4 \times 10^{-5}$  M for (Left) and  $3.3 \times 10^{-5}$  M for (Right)) upon titrating against increasing concentrations of (Left)  $\text{Tb}(\text{CF}_3\text{SO}_3)_3$  (0→5 equiv.) and (Right)  $\text{Sm}(\text{CF}_3\text{SO}_3)_3$  (0 – 5 equiv.) at RT in  $\text{CH}_3\text{CN}$ .

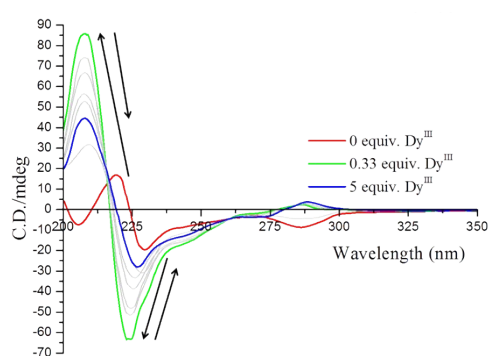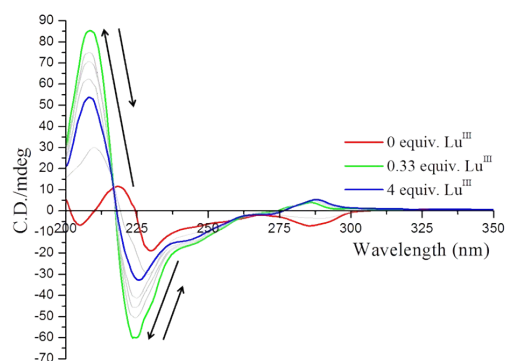

**Figure S29.** The overall changes in the CD spectra of **1** (*R*) ( $3.6 \times 10^{-5}$  M for (Left) and ( $3.5 \times 10^{-5}$  M) for (Right)) upon titrating against increasing concentrations of (Left)  $\text{Dy}(\text{CF}_3\text{SO}_3)_3$  (0→5 equiv.) and (Right)  $\text{Lu}(\text{CF}_3\text{SO}_3)_3$  (0→4 equiv.) at RT in  $\text{CH}_3\text{CN}$ .

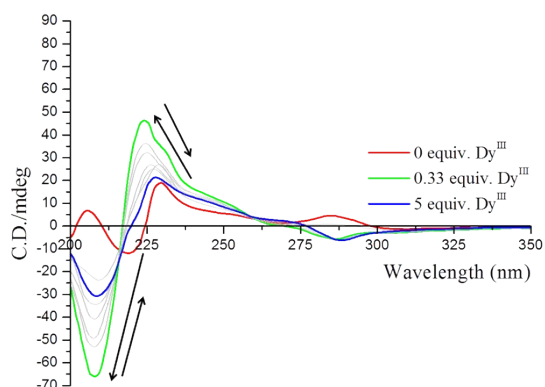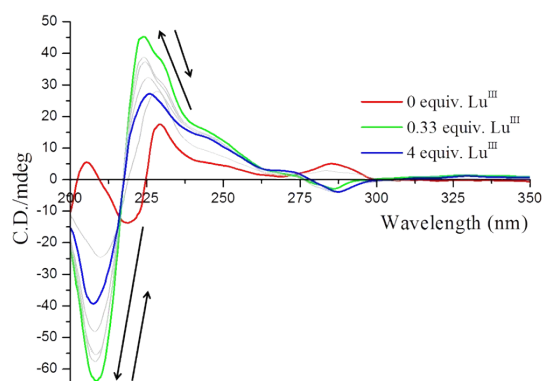

**Figure S30.** The overall changes in the CD spectra of **2** (*S*) ( $3.4 \times 10^{-5}$  M for (Left) and ( $3.4 \times 10^{-5}$  M) for (Right)) upon titrating against increasing concentrations of (Left)  $\text{Dy}(\text{CF}_3\text{SO}_3)_3$  (0→5 equiv.) and (Right)  $\text{Lu}(\text{CF}_3\text{SO}_3)_3$  (0→4 equiv.) at RT in  $\text{CH}_3\text{CN}$ .

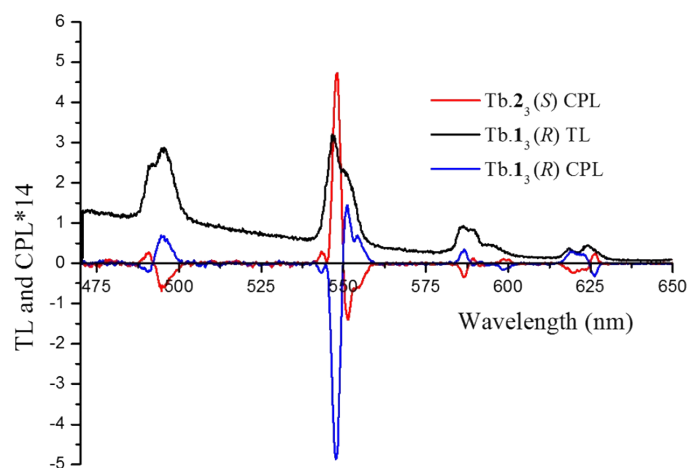

**Figure S31.** Total  $\text{Ln}^{\text{III}}$ -centred emission and CPL spectra of complexes  $\text{Tb.1}_3$  (*R*) and  $\text{Tb.2}_3$  (*S*) recorded in  $\text{CH}_3\text{CN}$  (excitation at  $\lambda = 281\text{nm}$ ).

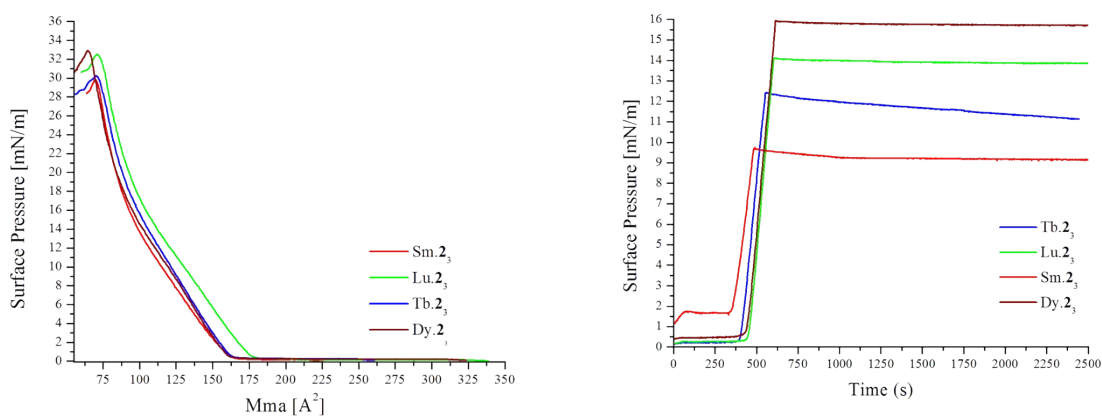

**Figure S32.** (Left) Surface pressure-area isotherm of  $\text{Ln.2}_3$  and (Right) monolayer stability graph of  $\text{Ln.2}_3$ .

**Table S4.** Surface-pressure and corresponding mean molecular area values upon film collapse for  $\text{Ln.L}_3$  ( $\text{Ln} = \text{Eu}^{\text{III}}$ ,  $\text{Nd}^{\text{III}}$ ,  $\text{Tb}^{\text{III}}$ ,  $\text{Sm}^{\text{III}}$ ,  $\text{Lu}^{\text{III}}$ ,  $\text{Dy}^{\text{III}}$  and  $\text{L} = \mathbf{1}$  and  $\mathbf{2}$ ). \*Data from references 21(a) and 22.

| Complex                        | Surface-pressure at collapse (mN/m) |       | Mean molecular area (Å <sup>2</sup> /molecule) |       |
|--------------------------------|-------------------------------------|-------|------------------------------------------------|-------|
|                                | L = 1                               | L = 2 | L = 1                                          | L = 2 |
| Eu.L <sub>3</sub> <sup>*</sup> | 34                                  | 29    | 74                                             | 76    |
| Nd.L <sub>3</sub> <sup>*</sup> | 32                                  | 33    | 71                                             | 74    |
| Tb.L <sub>3</sub>              | 33                                  | 30    | 66                                             | 71    |
| Sm.L <sub>3</sub>              | 35                                  | 30    | 70                                             | 70    |
| Lu.L <sub>3</sub>              | 34                                  | 33    | 62                                             | 71    |
| Dy.L <sub>3</sub>              | 32                                  | 33    | 58                                             | 65    |

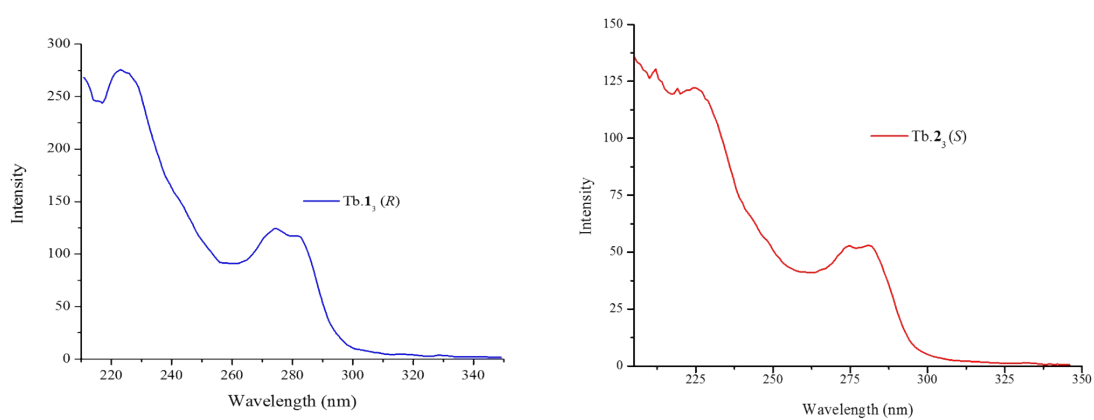

**Figure S33.** Excitation spectra ( $\lambda_{em} = 545$  nm) of (Left) Tb.1<sub>3</sub> and (Right) Tb.2<sub>3</sub> LB monolayers.
